# Supplementary material
Source: HighWire-hosted journal article supplement (https://gut.bmj.com/content/72/6/1186)

## Suppl. Figure 1. Characterization of protein constructs by SDS-PAGE and Western blot.

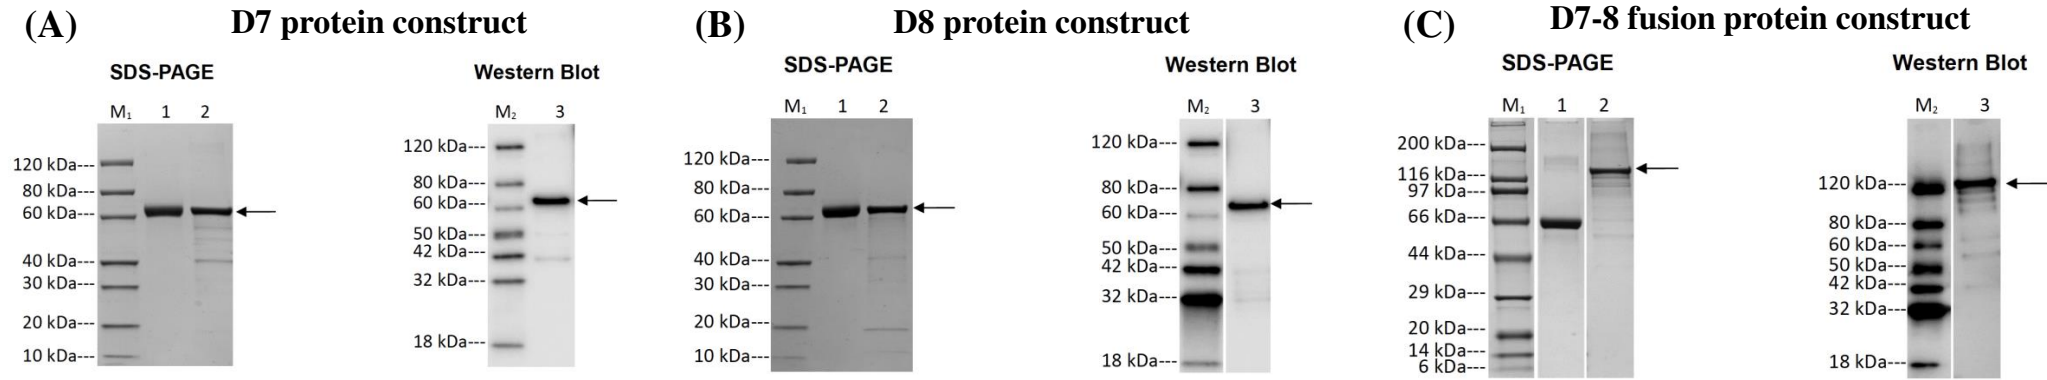

Supplement: inline-supplementary-material-2 [file inline-supplementary-material-2.pdf]
