# Supplementary material
Source: HighWire-hosted journal article supplement (https://gut.bmj.com/content/72/6/1186)

## Suppl. Figure 2. ELISA (A) and HBV *in vitro* neutralization (B) for all mice groups vaccinated with different combinations of DNA/protein preS1-HDAg or only HDAg constructs.

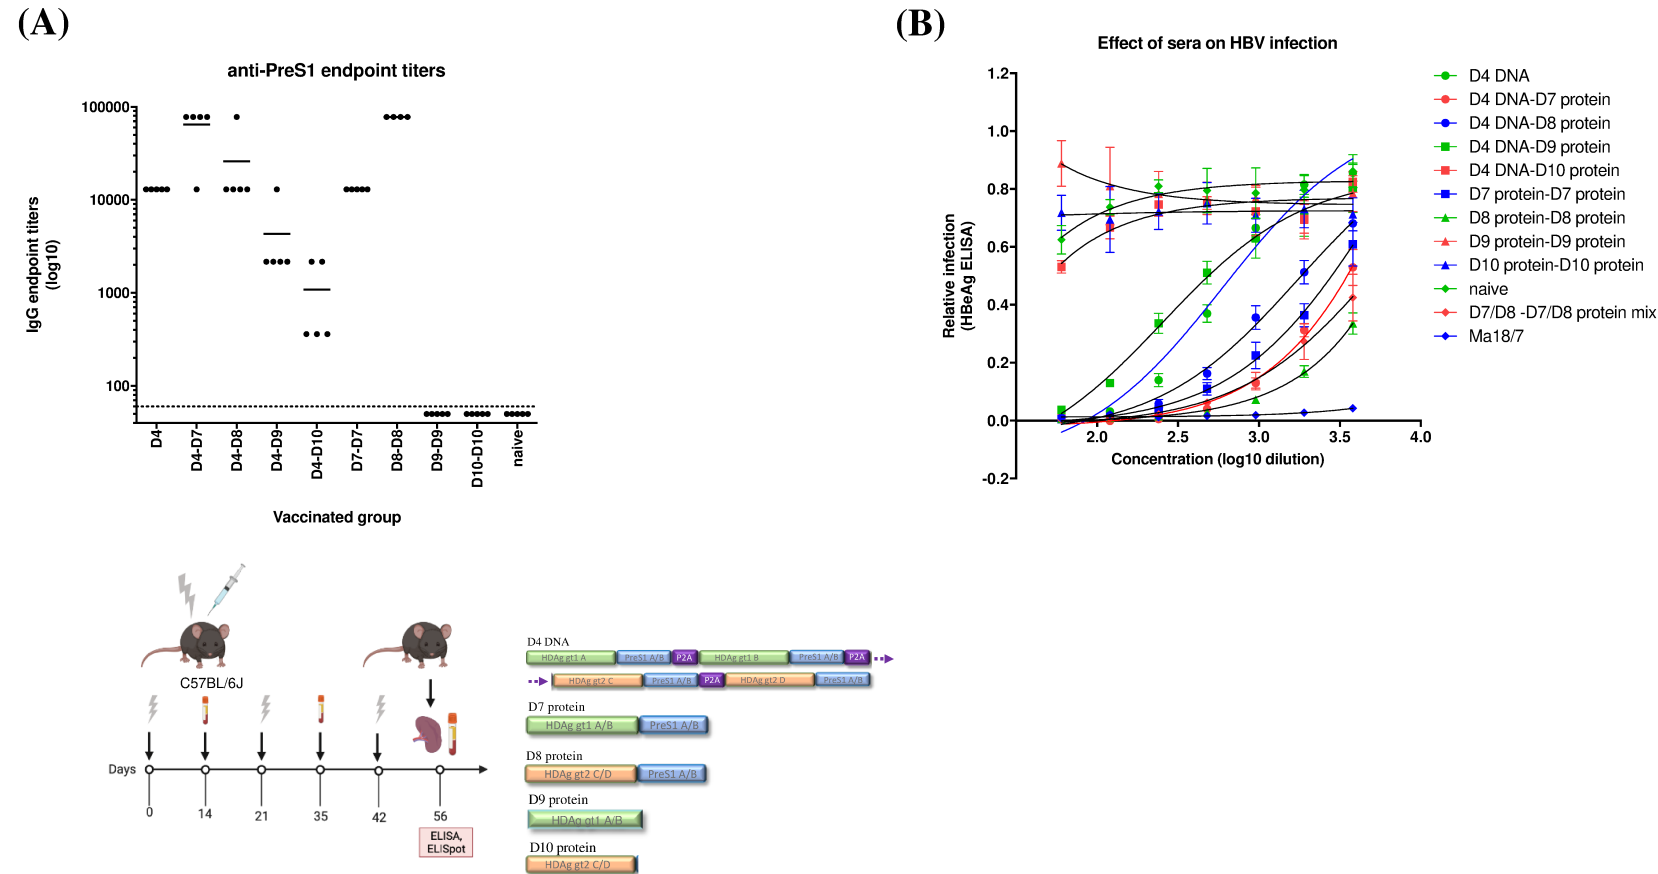

Supplement: inline-supplementary-material-4 [file inline-supplementary-material-4.pdf]
